# Supplementary material for: Cysteamine Eye Drops in Hyaluronic Acid Packaged in Innovative Single-Dose Systems: Stability and Ocular Biopermanence
Source: MDPI journal article supplement (doi:10.3390/pharmaceutics14102194), 2022-10-15
Supplement: s1 [file s1]

# Supplementary Material: Cysteamine Eye Drops in Hyaluronic Acid Packaged in Innovative Single-Dose Systems: Stability and Ocular Biopermanence

Ana Castro-Balado <sup>1,2,3†</sup>, Enrique Bandín-Vilar <sup>1,2,3†</sup>, Andrea Cuartero-Martínez <sup>2†</sup>, Laura García-Quintanilla <sup>1,2,3</sup>; Gonzalo Hermelo-Vidal <sup>2</sup>, Xurxo García-Otero <sup>3,4</sup>, Lorena Rodríguez-Martínez <sup>2</sup>, Jesús Mateos <sup>2</sup>, Manuela Hernández-Blanco <sup>5</sup>, Pablo Aguiar <sup>4</sup>, Irene Zarra-Ferro <sup>1,2</sup>, Miguel González-Barcia <sup>1,2</sup>, Cristina Mondelo-García <sup>1,2,\*</sup>, Francisco J. Otero-Espinar <sup>3,\*</sup> and Anxo Fernández-Ferreiro <sup>1,2,\*</sup>

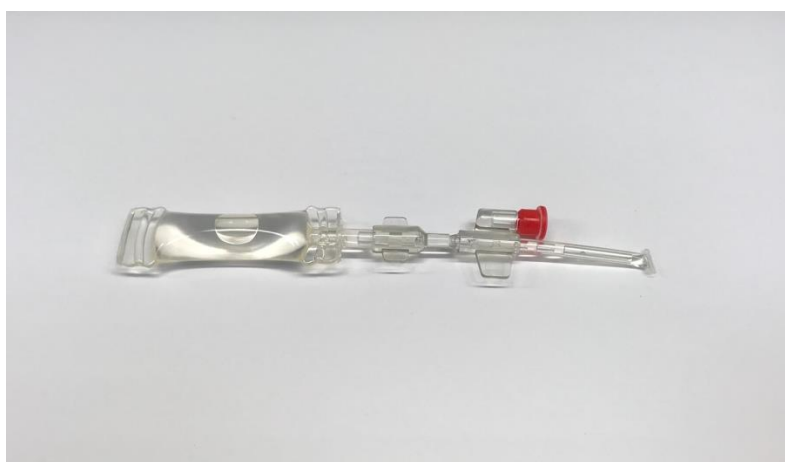

**Figure S1.** COL Eye Drops System® used in the stability study, provided from Biomed Device.

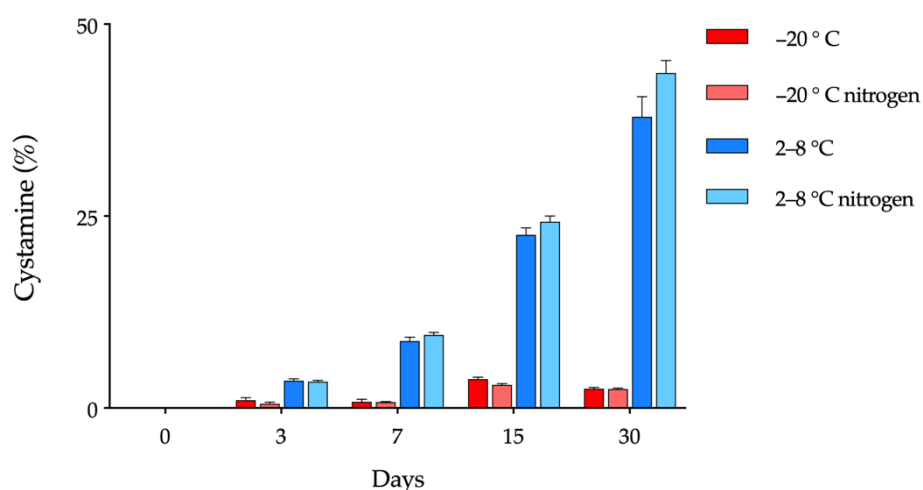

**Figure S2.** Cystamine content with respect to the initial concentration throughout the study for each of the temperature settings (refrigeration/freezing) and presence/absence of nitrogen.

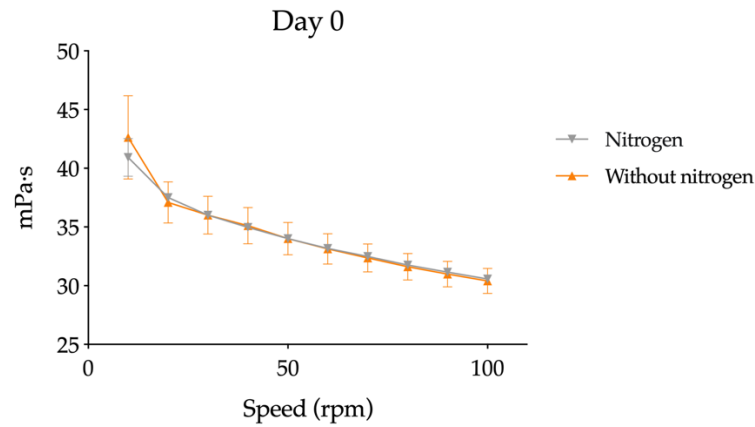

**Figure S3.** Speed-scan test at 25 °C of the cysteamine formulations with presence/absence of nitrogen at day 0, where the viscosity is measured at different revolutions per minute (rpm).

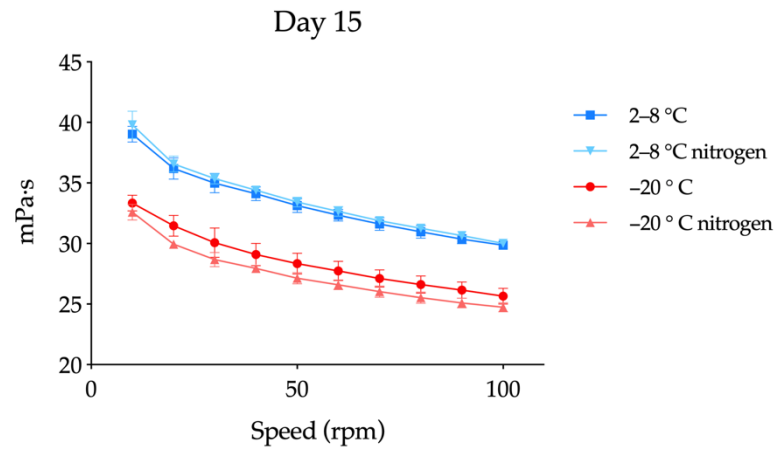

**Figure S4.** Speed-scan test at 25 °C of the cysteamine formulations stored at different temperature conditions and presence/absence of nitrogen at day 15, where the viscosity is measured at different rpm.

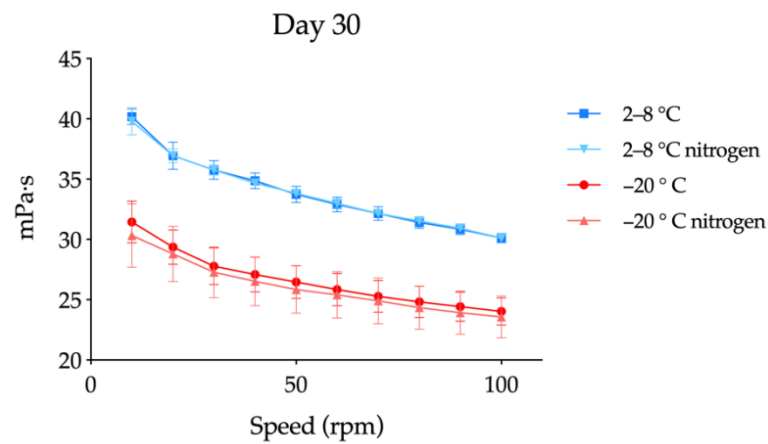

**Figure S5.** Speed-scan test at 25 °C of the cysteamine formulations stored at different temperature conditions and presence/absence of nitrogen at day 30, where the viscosity is measured at different rpm.
